# Supplementary material for: Dust storms from the Taklamakan Desert significantly darken snow surface on surrounding mountains
Source: Copernicus journal article supplement (doi:10.5194/acp-24-5199-2024), 2024-05-03
Supplement: Supplementary file 1 [file acp-24-5199-2024-supplement.pdf]

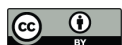

*Supplement of*

## **Dust storms from the Taklamakan Desert significantly darken snow surface on surrounding mountains**

**Yuxuan Xing et al.**

*Correspondence to:* Wei Pu ([puwei@lzu.edu.cn](mailto:puwei@lzu.edu.cn))

The copyright of individual parts of the supplement might differ from the article licence.

## 1 **S1 Method**

### 2 **S1.1 Attribution of the spatial variation in snow albedo reduction**

3 As noted above, the snow albedo reduction depends mainly on the dust content, snow  
4 optical effective radius ( $R_{\text{eff}}$ ), snow depth (SD) and solar zenith angle (SZ). Snow  
5 optical effective radius and snow depth can be categorized as the snow properties (SP).  
6 Here we choose these three variables to discuss their fractional contributions to the  
7 spatial variability in snow albedo reduction.  $\Delta\alpha$  can be expressed as

$$8 \quad \Delta\alpha = f(\text{dust}, \text{SP}, \text{SZ}). \quad (\text{S1})$$

9 The spatial variability about snow albedo reduction due to dust can be described as

$$10 \quad \Delta\alpha(\text{dust}) = f(\text{dust}, \overline{\text{SP}}, \overline{\text{SZ}}), \quad (\text{S2})$$

11 where  $\overline{\text{SP}}$  and  $\overline{\text{SZ}}$  indicate spatial-mean values of SP, and SZ. Similarly, we can  
12 obtain the following equations:

$$13 \quad \Delta\alpha(\text{SP}) = f(\overline{\text{dust}}, \text{SP}, \overline{\text{SZ}}), \quad (\text{S3})$$

$$14 \quad \Delta\alpha(\text{SZ}) = f(\overline{\text{dust}}, \overline{\text{SP}}, \text{SZ}). \quad (\text{S4})$$

15 We fit the  $\Delta\alpha$  based on multiple linear regression, we can express it as

$$16 \quad \Delta\alpha_{\text{fit}} = a \times \Delta\alpha(\text{dust}) + b \times \Delta\alpha(\text{SP}) + c \times \Delta\alpha(\text{SZ}), \quad (\text{S5})$$

17 where  $\Delta\alpha_{\text{fit}}$  is the fitted snow albedo reduction, and  $a$ ,  $b$ ,  $c$  represent the regression  
18 coefficients. As a result, we can use  $\Delta\alpha_{\text{fit}}$  to replace  $\Delta\alpha$  to access the contribution to  
19 spatial variation of individual variables, Eq. (14) can be written as follows:

$$20 \quad \Delta\alpha_{\text{fit}} - \overline{\Delta\alpha_{\text{fit}}} = a \times (\Delta\alpha(\text{dust}) - \overline{\Delta\alpha(\text{dust})}) + b \times (\Delta\alpha(\text{SP}) - \overline{\Delta\alpha(\text{SP})}) + c \times (\Delta\alpha(\text{SZ}) - \overline{\Delta\alpha(\text{SZ})}), (\text{S6})$$

21 where we use  $\Delta\alpha_{\text{fit}} - \overline{\Delta\alpha_{\text{fit}}}$  represent snow albedo reduction anomaly

22 ( $\Delta\alpha_{\text{fit}}^{\text{anomaly}}$ ). After, Eq. (15) can be written as

23 
$$\Delta\alpha_{\text{fit}}^{\text{anomaly}} = a \times \Delta\alpha_{\text{anomaly}}(\text{dust}) + b \times \Delta\alpha_{\text{anomaly}}(\text{SP}) + c \times \Delta\alpha_{\text{anomaly}}(\text{SZ}). \quad (\text{S7})$$

24 According to Pu et al. (2019) and Cui (2021), the fractional contribution of dust to the  
 25 spatial variability in snow albedo reduction ( $F_{\text{dust}}$ ) can be written as

26 
$$F_{\text{dust}} = \frac{1}{n} \sum_{i=1}^n \frac{(a \times \Delta\alpha_{\text{anomaly}}(\text{dust}))^2}{X_i}, \quad (\text{S8})$$

27 
$$X_i = (a \times \Delta\alpha_{\text{anomaly}}(\text{dust})_i)^2 + (b \times \Delta\alpha_{\text{anomaly}}(\text{SP})_i)^2 + (c \times \Delta\alpha_{\text{anomaly}}(\text{SZ})_i)^2. \quad (\text{S9})$$

28 where n represent the length of the data set. Similarly, we can get the  $F_{\text{SP}}$  and  $F_{\text{SZ}}$ .

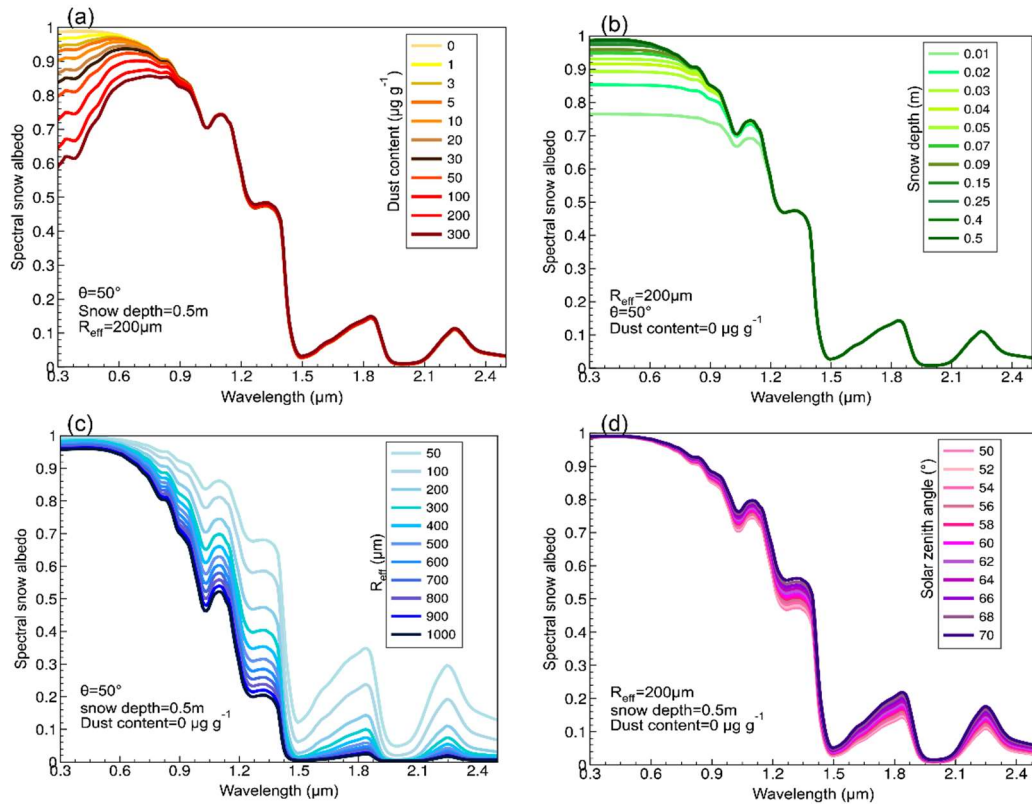

29  
 30 **Figure S1. Variations in spectral snow albedo due to (a) dust content ( $\mu\text{g g}^{-1}$ ), (b)**  
 31 **snow depth (m), (c) snow grain size ( $\mu\text{m}$ ), and (d) solar zenith angle ( $^\circ$ ) while the**  
 32 **other three parameters are kept constant.**

33

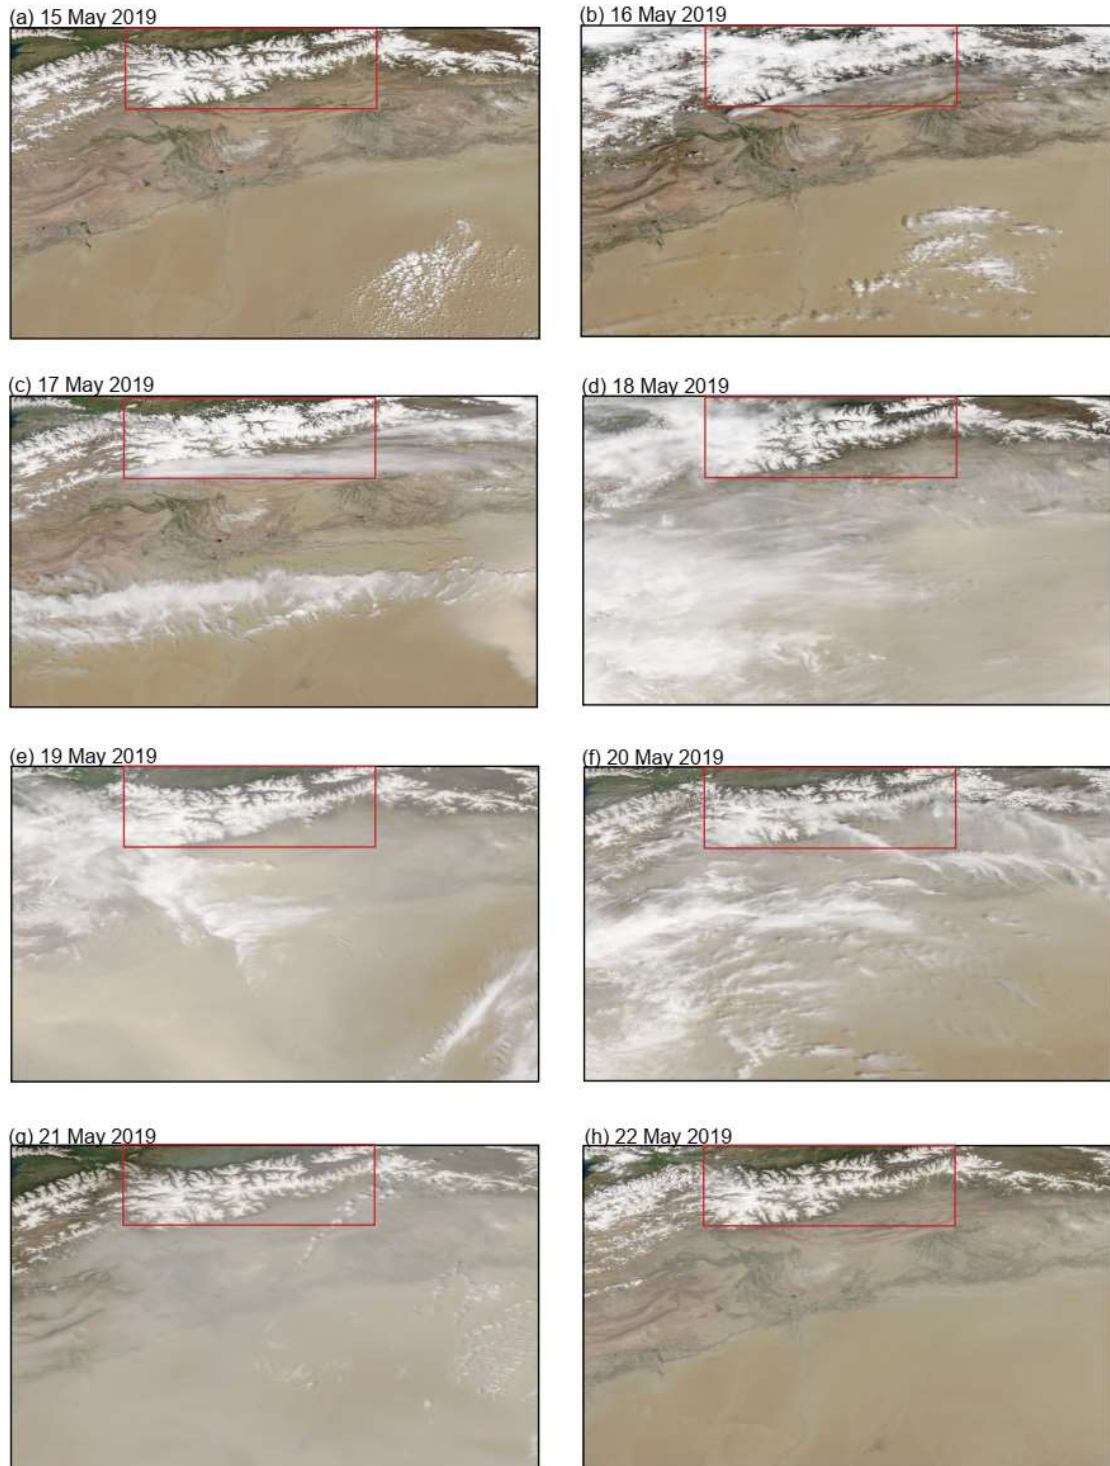

34

35 **Figure S2. Satellite observations during the 15–22 May 2019 severe dust event**  
36 **across the Tien Shan (a-h). Satellite images (a-h) are from Terra/MODIS**  
37 **(<https://worldview.earthdata.nasa.gov>).**

38

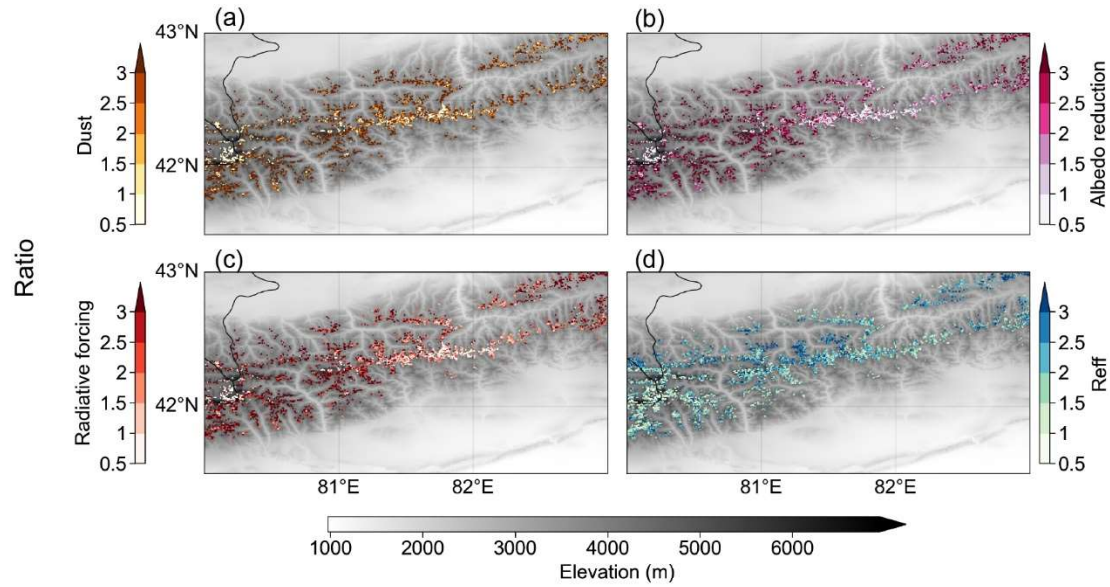

39

40 **Figure S3. Spatial distribution of the ratios between 15 May 2019 and 22 May 2019**  
 41 **of (a) dust, (b) albedo reduction, (c) radiative forcing and (d)  $R_{\text{eff}}$ . The background**  
 42 **images in (a-d) show the elevation of Tien Shan.**

43

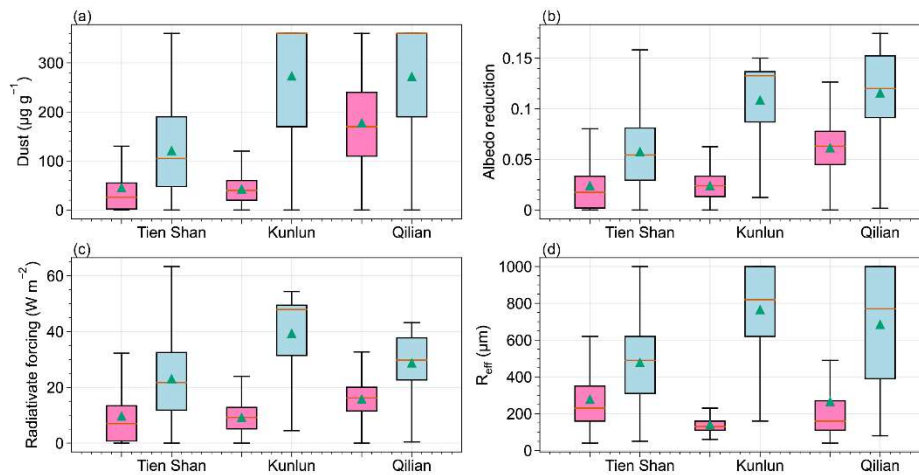

44

45 **Figure S4. Statistics for regionally averaged (a) dust, (b) albedo reduction, (c)**  
 46 **radiative forcing and (d)  $R_{\text{eff}}$  for Tien Shan, Kunlun Mountains and Qilian**  
 47 **Mountains. The pink color shows 15 May, 2019, 23 August, 2019 and 01 November,**  
 48 **2012 before the dust storm in three regions. The blue color shows 22 May, 2019,**  
 49 **06 Sep, 2019 and 04 November, 2012 after the dust storm in three regions. The**  
 50 **boxes denote the 25th and 75th quantiles, and the horizontal lines represent the**  
 51 **50th quantiles (medians); the averages are shown as blue triangle; the whiskers**  
 52 **denote the 5th and 95th quantiles.**

53

54

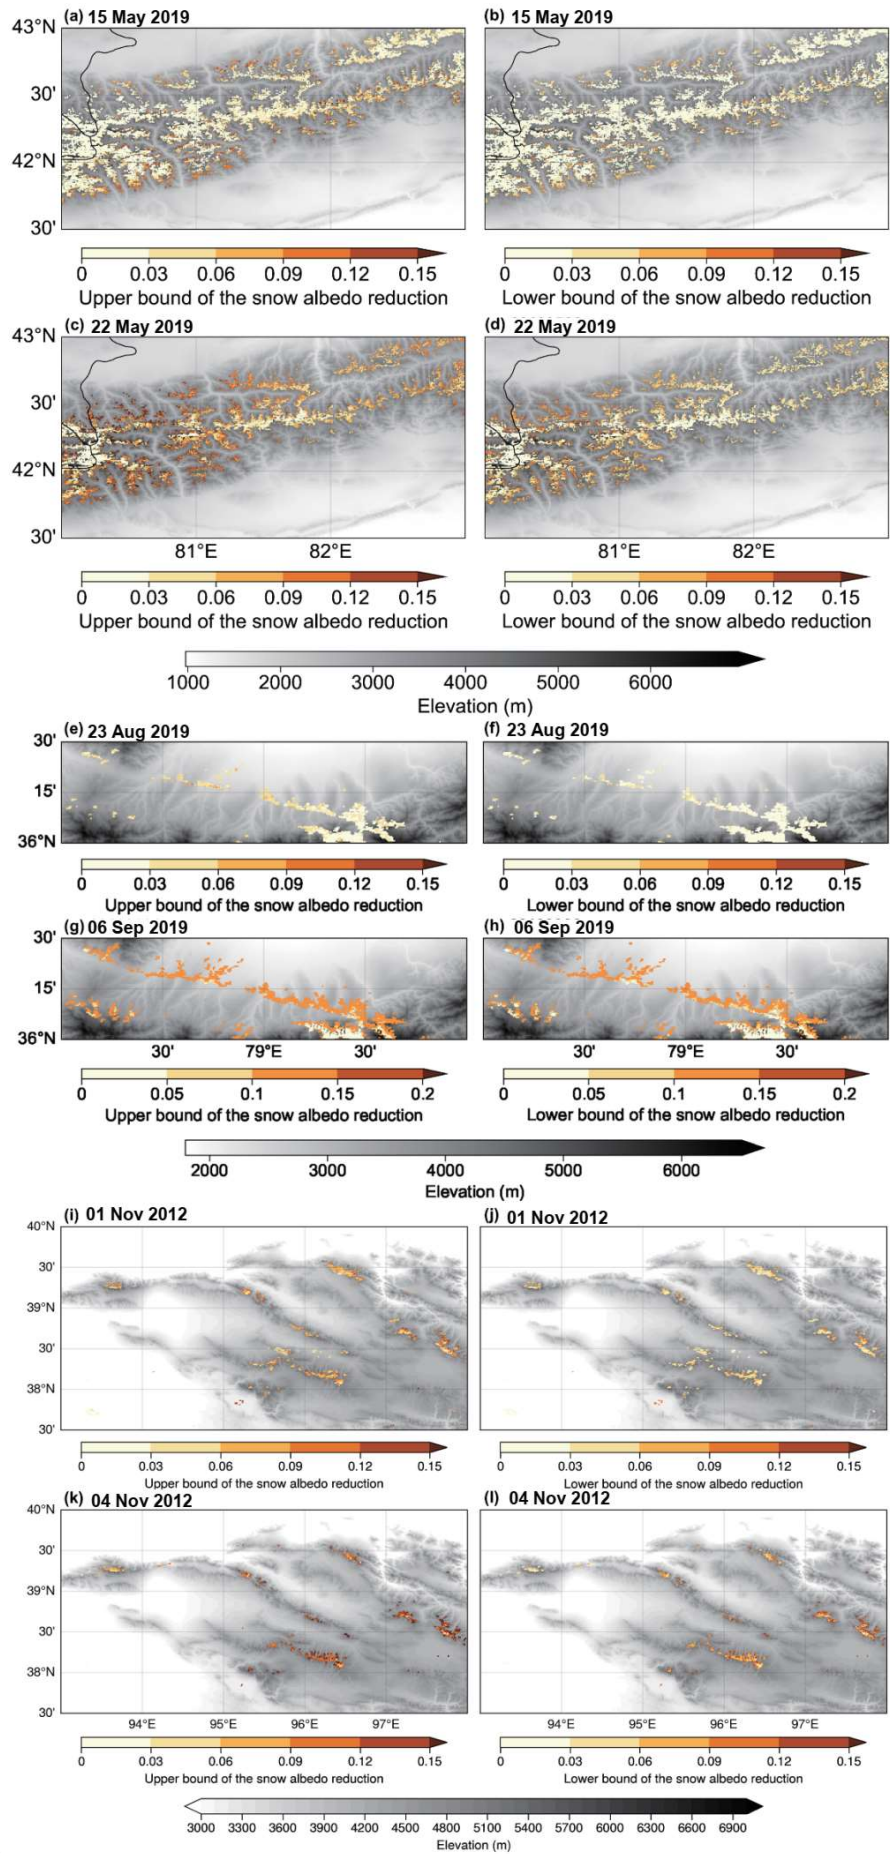

56 **Figure S5. The overall lower bound and upper bound of the uncertainty value of**  
57 **snow albedo reduction retrieval due to atmospheric correction in Tien Shan (a-d),**  
58 **Kunlun Mountains (e-h) and Qilian Mountains (i-l).**  
59

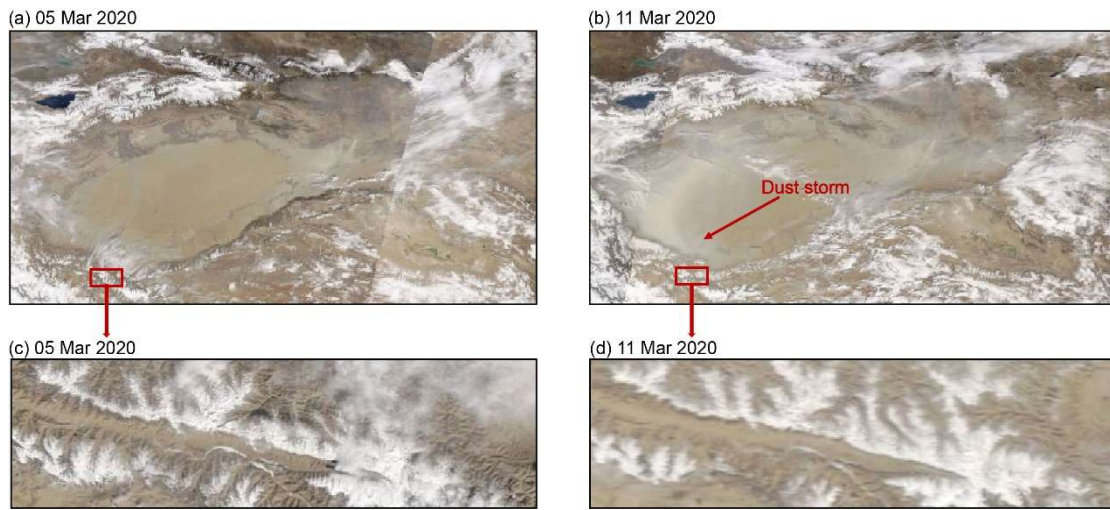

60  
61 **Figure S6. Satellite observations during the 05–11 March 2020 severe dust event**  
62 **across the Kunlun Mountains. (a, c) Terra/MODIS satellite true-color images**  
63 **acquired on 05 March 2020, prior to the dust storm. (b, d) Terra/MODIS satellite**  
64 **images acquired on 11 March 2020, with significant snow darkening across the**  
65 **Kunlun Mountains after the dust storm. Satellite images (a-d) are from**  
66 **Terra/MODIS (<https://worldview.earthdata.nasa.gov>).**  
67

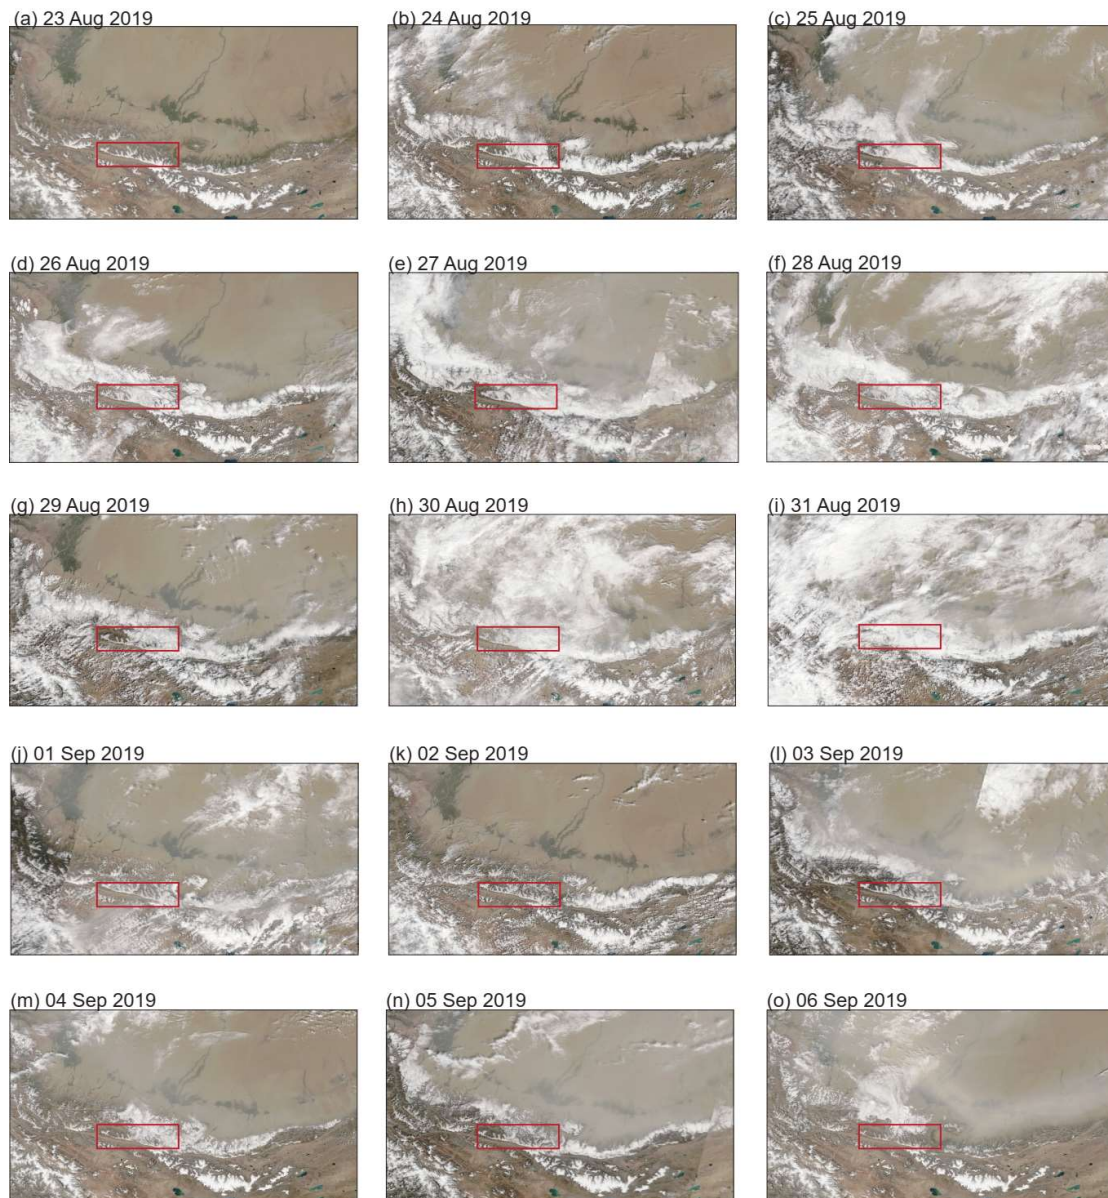

68  
69  
70  
71  
72

**Figure S7. Satellite observations during the 23 August to 06 September 2019 severe dust event across the Kunlun Mountains (a-o). Satellite images (a-o) are from Terra/MODIS (<https://worldview.earthdata.nasa.gov>).**

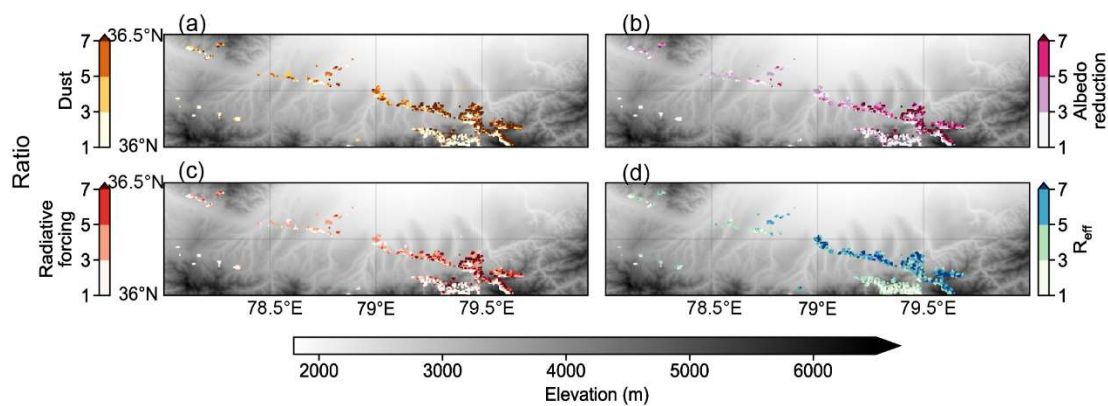

73



74 **Figure S8. Spatial distribution of the ratio between 23 Aug 2019 and 06 Sep 2019**  
 75 **of (a) dust, (b) albedo reduction, (c) radiative forcing and (d)  $R_{\text{eff}}$ . The background**  
 76 **images in (a-d) show the elevation of Kunlun Mountains.**

77  
 78

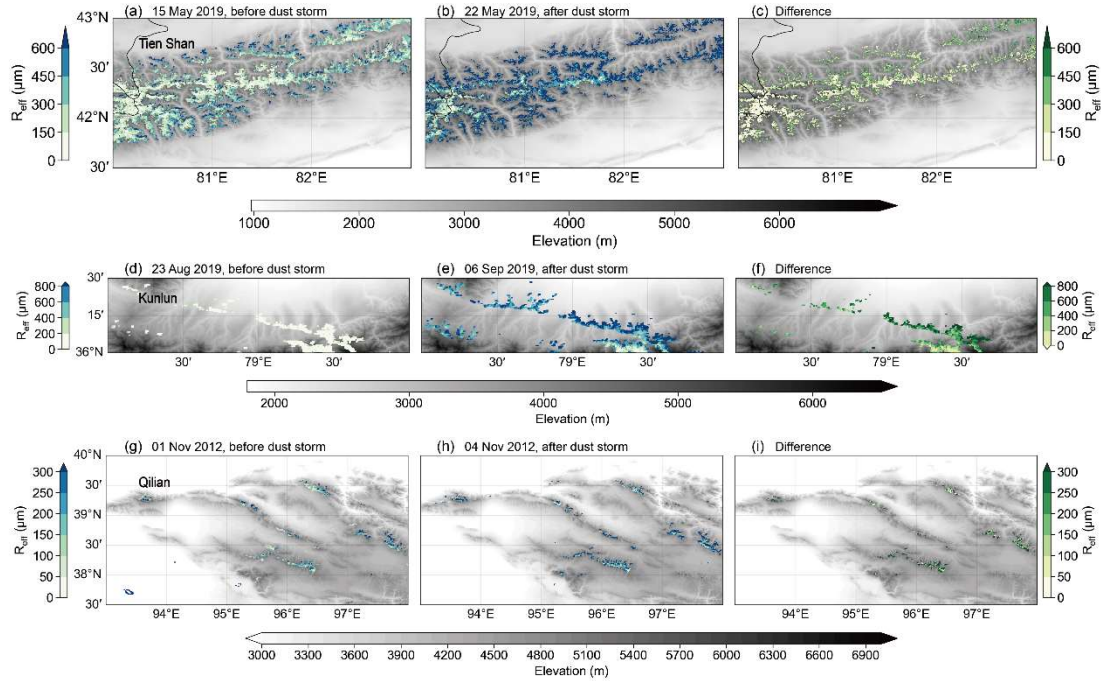

79

80 **Figure S9. Spatial distributions of the average values and differences of  $R_{\text{eff}}$  across**  
 81 **the (a-c) Tien Shan, (d-f) Kunlun Mountains and (g-i) Qilian Mountains,**  
 82 **respectively.**

83

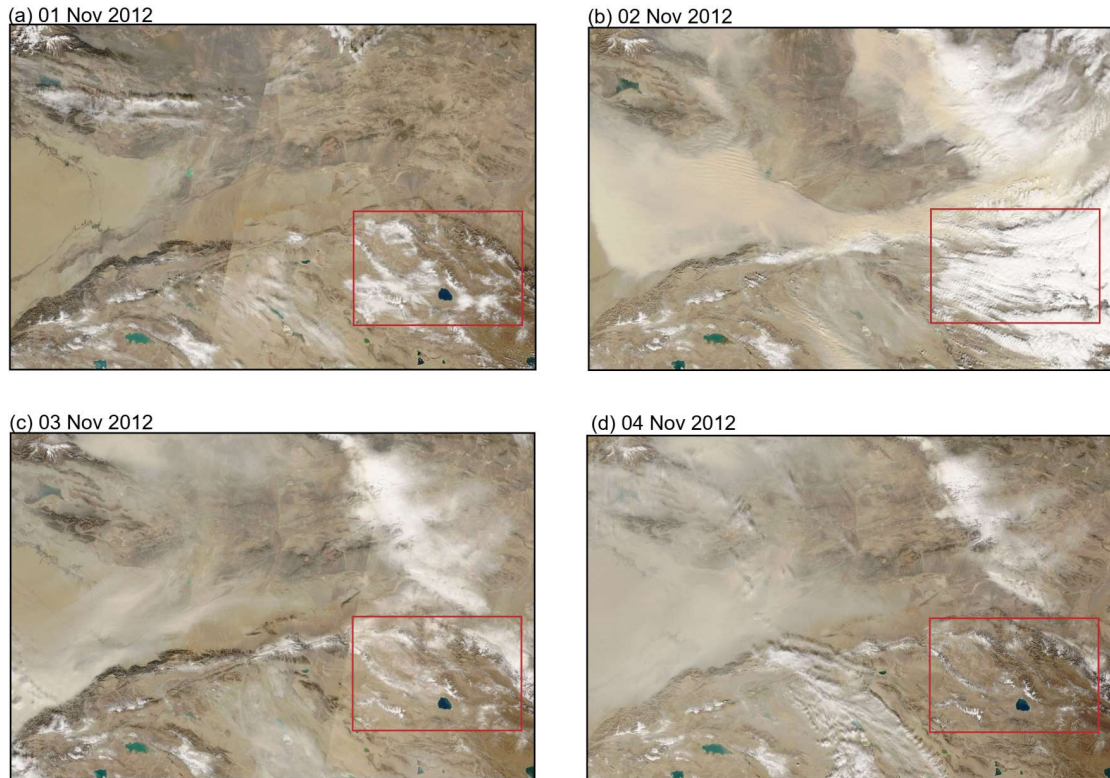

84  
 85 **Figure S10. Satellite observations during the 01–04 November 2012 severe dust**  
 86 **event across the Qilian Mountains (a-d). Satellite images (a-d) are from**  
 87 **Terra/MODIS (<https://worldview.earthdata.nasa.gov>).**  
 88

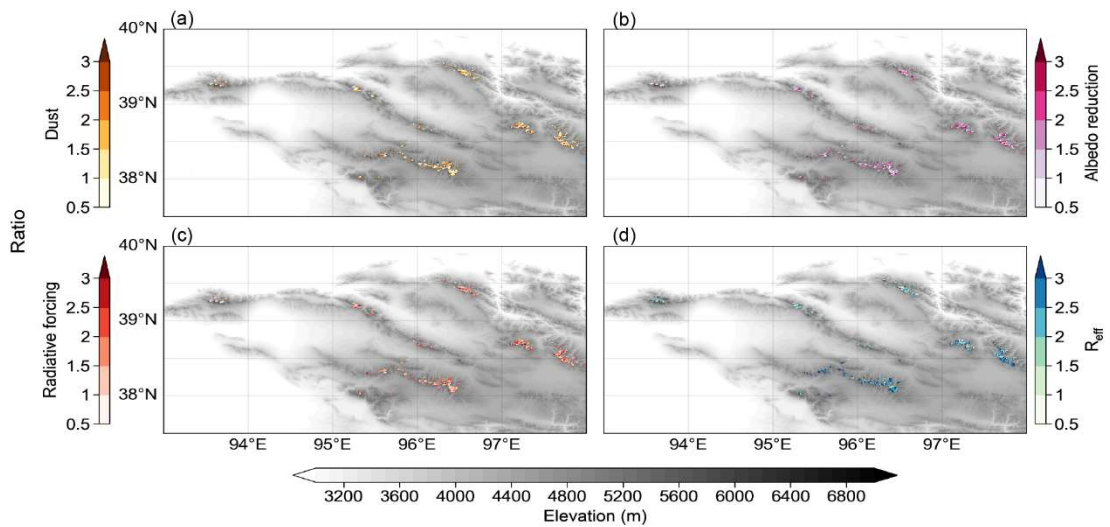

89  
 90 **Figure S11. Spatial distribution of the ratio between 01 Nov 2012 and 04 Nov 2012**  
 91 **of (a) dust, (b) albedo reduction, (c) radiative forcing and (d)  $R_{eff}$ . The background**  
 92 **images in (a-d) show the elevation of Qilian Mountains.**

93  
 94

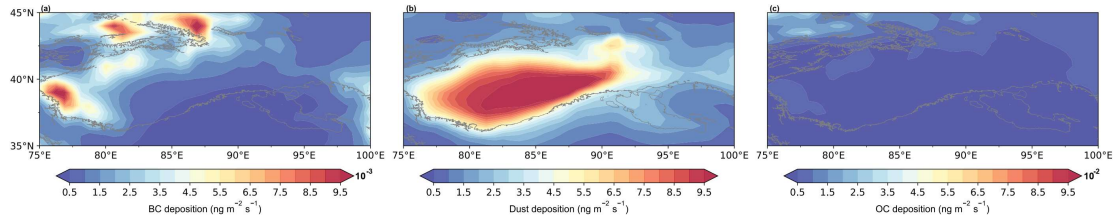

95

96 **Figure S12. Spatial distributions of the averaged MERRA-2 (a) BC, (b) dust and**  
 97 **(c) OC deposition rate from March to August 2019.**

98

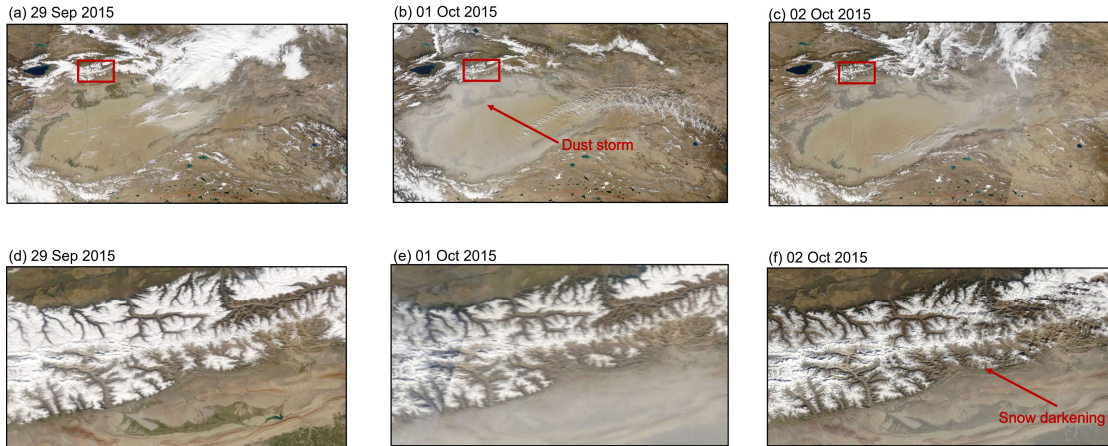

99

100 **Figure S13. Satellite observations during the 29 September to 02 October 2015**  
 101 **severe dust event across the Tien Shan (a-f). Satellite images (a-f) are from**  
 102 **Terra/MODIS (<https://worldview.earthdata.nasa.gov>).**

103

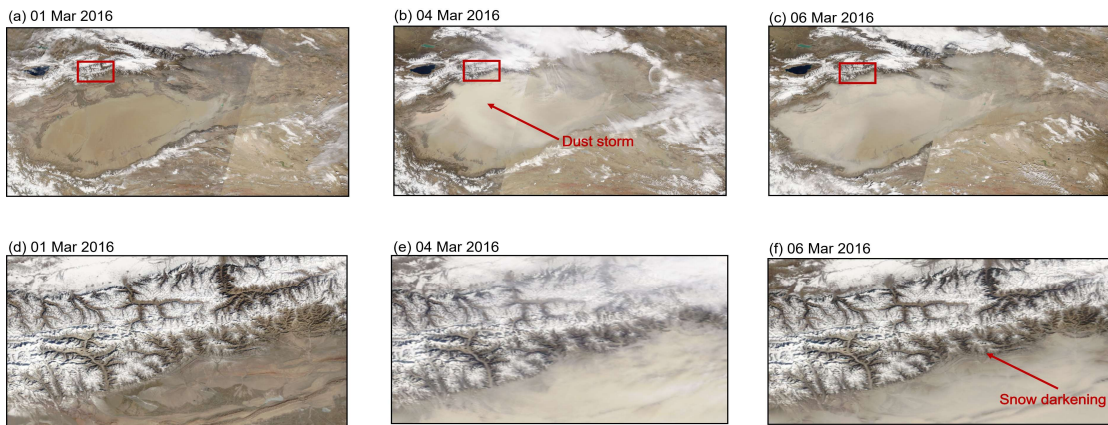

104

105 **Figure S14. Satellite observations during the 01–06 March 2016 severe dust event**  
 106 **across the Tien Shan (a-f). Satellite images (a-f) are from Terra/MODIS**  
 107 **(<https://worldview.earthdata.nasa.gov>).**

108

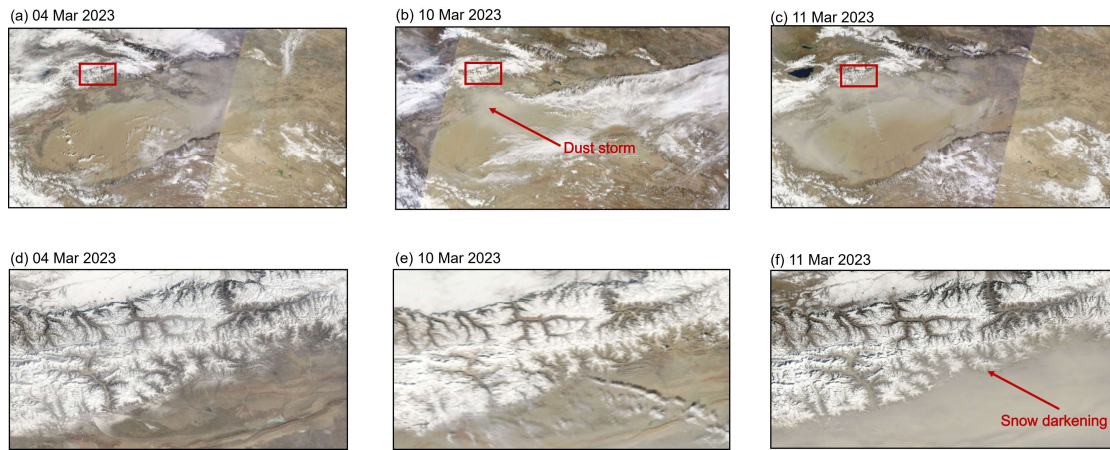

109

110 **Figure S15. Satellite observations during the 04–11 March 2023 severe dust event**  
 111 **across the Tien Shan (a-f). Satellite images (a-f) are from Terra/MODIS**  
 112 **(<https://worldview.earthdata.nasa.gov>).**

113

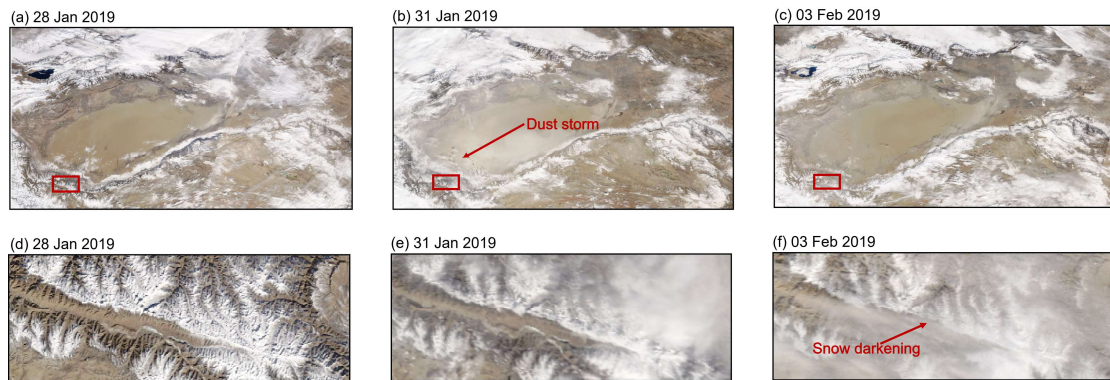

114

115 **Figure S16. Satellite observations during the 28 January to 03 February 2019**  
 116 **severe dust event across the Kunlun Mountains (a-f). Satellite images (a-f) are**  
 117 **from Terra/MODIS (<https://worldview.earthdata.nasa.gov>).**

118

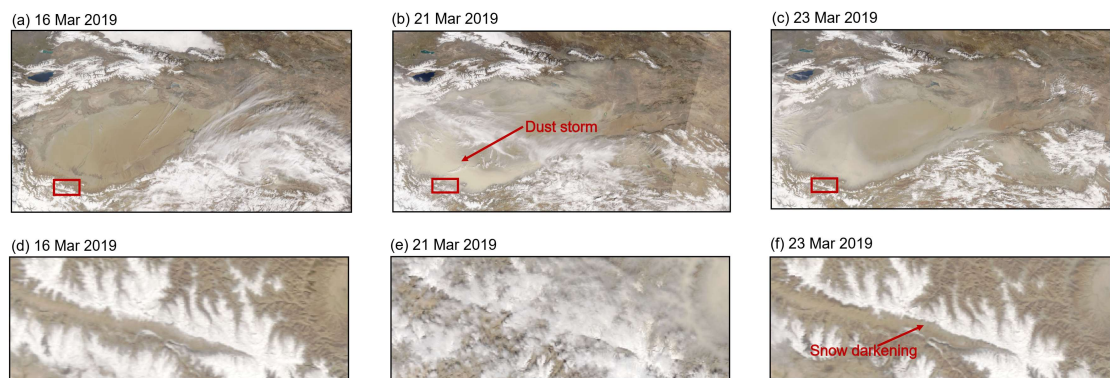

119

120 **Figure S17. Satellite observations during the 16–23 March 2019 severe dust event**  
 121 **across the Kunlun Mountains (a-f). Satellite images (a-f) are from Terra/MODIS**  
 122 **(<https://worldview.earthdata.nasa.gov>).**

123

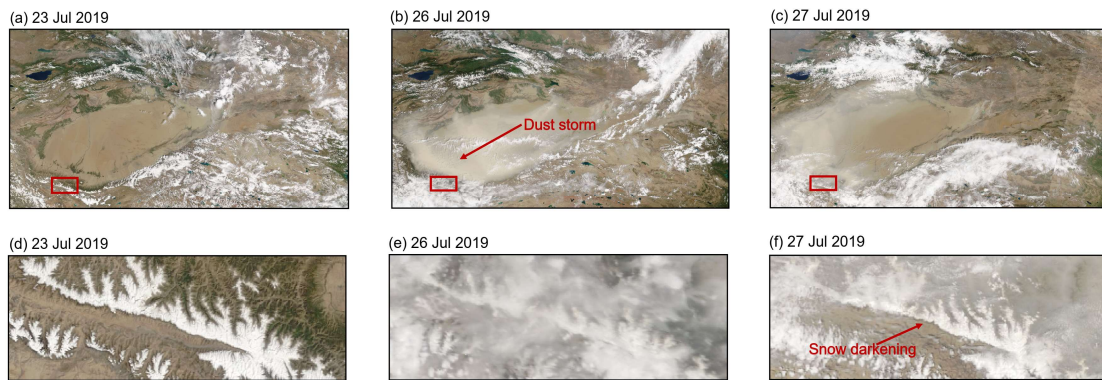

124

125 **Figure S18. Satellite observations during the 23–27 July 2019 severe dust event**  
126 **across the Kunlun Mountains (a-f). Satellite images (a-f) are from Terra/MODIS**  
127 **(<https://worldview.earthdata.nasa.gov>).**

128

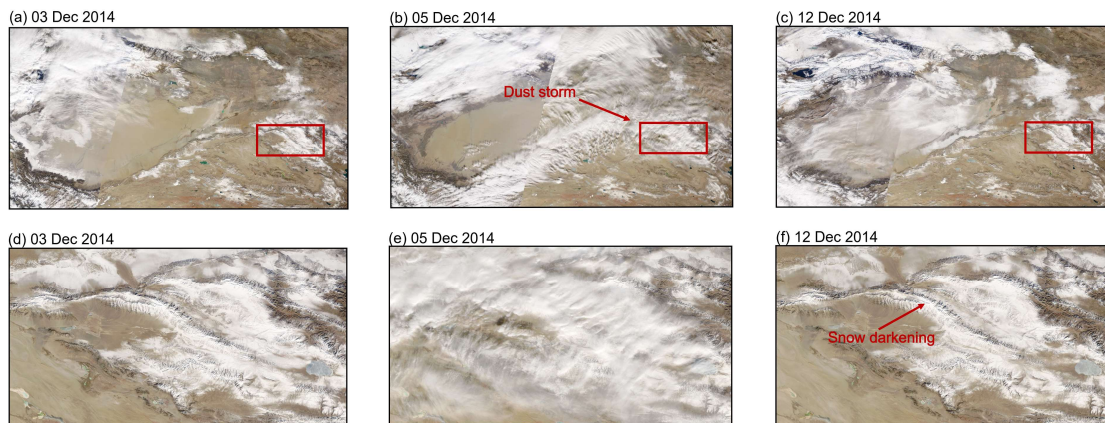

129

130 **Figure S19. Satellite observations during the 03–12 December 2014 severe dust**  
131 **event across the Qilian Mountains (a-f). Satellite images (a-f) are from**  
132 **Terra/MODIS (<https://worldview.earthdata.nasa.gov>).**

133

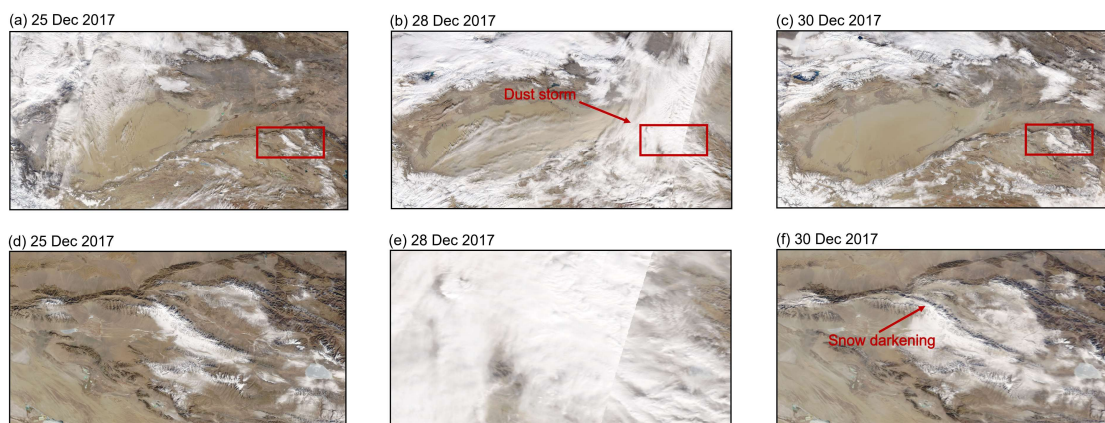

134

135 **Figure S20. Satellite observations during the 25–30 December 2017 severe dust**

136 event across the Qilian Mountains (a-f). Satellite images (a-f) are from  
137 Terra/MODIS (<https://worldview.earthdata.nasa.gov>).  
138

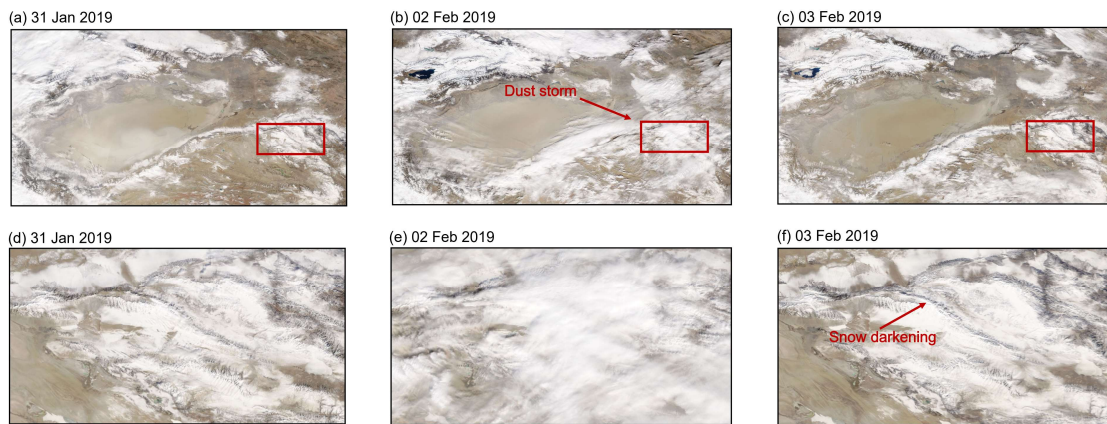

139  
140 **Figure S21. Satellite observations during the 31 January to 03 February 2019**  
141 **severe dust event across the Qilian Mountains (a-f). Satellite images (a-f) are from**  
142 **Terra/MODIS (<https://worldview.earthdata.nasa.gov>).**  
143
